# Supplementary material for: Ferric reductase-related proteins mediate fungal heme acquisition
Source: eLife journal article supplement (doi:10.7554/elife.80604), 2022-10-06
Supplement: fig1-data2 [file Figure 1 - source data 2.xlsx]

## Sheet: YPDpH8.5+Fz+Hm plate2
Application: Tecan i-control				Tecan i-control , 1.10.4.0
Device: infinite 200Pro				Serial number: 1306007910				Serial number of connected stacker:
Firmware: V_3.37_07/12_Infinite (Jul 20 2012/13.56.47)				MAI, V_3.37_07/12_Infinite (Jul 20 2012/13.56.47)
Date:	2021-12-05
Time:	17:26:16
System				PLATE-READER
User				MEDICINE\Multilabs
Plate				Greiner 96 Flat Bottom Transparent Polystyrol [GRE96ft.pdfx]
Plate-ID (Stacker)
Label: Label1
Mode				Absorbance
Wavelength				600	nm
Bandwidth				9	nm
Number of Flashes				25
Settle Time				0	ms
Part of Plate				A1-G12
Start Time:	12/05/2021 17:26:16
	Temperature: 23.2 °C
<>	1	2	3	4	5	6	7	8	9	10	11	12
A	1.1024	0.0905	0.0903	0.0822	0.0701	0.0776	0.0751	0.0796	0.0911	0.1092	0.1037	0.0713
B	1.1452	0.3147	0.1418	0.1151	0.1132	0.0748	0.0997	0.0826	0.0892	0.1155	0.1192	0.0703
C	1.048	0.4378	0.1232	0.1058	0.0872	0.0877	0.0944	0.0791	0.0821	0.0959	0.1257	0.0707
D	1.101	0.2389	0.3839	0.0873	0.0682	0.0742	0.0686	0.071	0.0728	0.0878	0.119	0.0713
E	0.7879	0.0926	0.0841	0.0798	0.0819	0.0664	0.072	0.0718	0.0748	0.0699	0.0695	0.0731
F	1.0072	0.0923	0.0825	0.0752	0.084	0.0685	0.0804	0.0795	0.0761	0.0733	0.1108	0.0719
G	1.0223	0.0965	0.0829	0.0759	0.0713	0.0803	0.0694	0.0627	0.0625	0.0661	0.0853	0.0735
End Time:	12/05/2021 17:27:24

## Sheet: YPDpH8.5+Fz+Hm plate1
Application: Tecan i-control				Tecan i-control , 1.10.4.0
Device: infinite 200Pro				Serial number: 1306007910				Serial number of connected stacker:
Firmware: V_3.37_07/12_Infinite (Jul 20 2012/13.56.47)				MAI, V_3.37_07/12_Infinite (Jul 20 2012/13.56.47)
Date:	2021-12-05
Time:	17:24:34
System				PLATE-READER
User				MEDICINE\Multilabs
Plate				Greiner 96 Flat Bottom Transparent Polystyrol [GRE96ft.pdfx]
Plate-ID (Stacker)
Label: Label1
Mode				Absorbance
Wavelength				600	nm
Bandwidth				9	nm
Number of Flashes				25
Settle Time				0	ms
Start Time:	12/05/2021 17:24:34
	Temperature: 23.1 °C
<>	1	2	3	4	5	6	7	8	9	10	11	12
A	1.1811	1.1732	0.4392	0.2657	0.2252	0.1155	0.1197	0.1109	0.0956	0.0931	0.0744	0.0707
B	1.0389	0.9489	0.3184	0.3438	0.2109	0.1331	0.1309	0.1179	0.1126	0.0894	0.1181	0.0699
C	1.0601	1.1545	0.402	0.0844	0.1921	0.1385	0.1386	0.1106	0.1089	0.1235	0.1373	0.0692
D	1.0839	0.2766	0.0834	0.0716	0.0683	0.066	0.0691	0.0639	0.0649	0.066	0.0697	0.0681
E	1.0632	0.4247	0.0852	0.0665	0.0686	0.0654	0.0675	0.0627	0.0646	0.0707	0.0668	0.0712
F	1.0838	0.4826	0.0828	0.0709	0.0661	0.0673	0.0634	0.0596	0.0603	0.0567	0.0644	0.0706
G	0.9216	0.1042	0.0903	0.0841	0.0777	0.0801	0.0736	0.0805	0.0803	0.0827	0.0952	0.0728
H	1.1965	0.1128	0.0916	0.0904	0.0745	0.0858	0.1152	0.0853	0.0818	0.098	0.1204	0.0712
End Time:	12/05/2021 17:25:52

## Sheet: YPD+Fz+Hm plate2
Application: Tecan i-control				Tecan i-control , 1.10.4.0
Device: infinite 200Pro				Serial number: 1306007910				Serial number of connected stacker:
Firmware: V_3.37_07/12_Infinite (Jul 20 2012/13.56.47)				MAI, V_3.37_07/12_Infinite (Jul 20 2012/13.56.47)
Date:	2021-12-05
Time:	17:22:56
System				PLATE-READER
User				MEDICINE\Multilabs
Plate				Greiner 96 Flat Bottom Transparent Polystyrol [GRE96ft.pdfx]
Plate-ID (Stacker)
Label: Label1
Mode				Absorbance
Wavelength				600	nm
Bandwidth				9	nm
Number of Flashes				25
Settle Time				0	ms
Part of Plate				A1-G12
Start Time:	12/05/2021 17:22:56
	Temperature: 23.3 °C
<>	1	2	3	4	5	6	7	8	9	10	11	12
A	1.0931	0.6076	0.1059	0.1039	0.1012	0.0984	0.0989	0.0953	0.095	0.0977	0.0998	0.0953
B	1.269	1.1701	1.1811	0.4163	0.1195	0.1127	0.1015	0.1008	0.098	0.0967	0.0972	0.096
C	1.1817	1.1689	1.1609	0.5252	0.1391	0.1116	0.104	0.1008	0.098	0.0985	0.0994	0.0953
D	1.2122	1.2189	1.059	0.5765	0.1618	0.1011	0.099	0.0951	0.0953	0.0924	0.0908	0.0965
E	1.0872	0.2622	0.1085	0.1027	0.0989	0.0956	0.0929	0.0941	0.0934	0.0972	0.0962	0.0965
F	1.1341	0.3911	0.1123	0.1051	0.1011	0.0974	0.0972	0.0925	0.0938	0.0948	0.0922	0.0957
G	1.1578	0.3167	0.1111	0.1045	0.102	0.0989	0.0984	0.095	0.0945	0.0957	0.0942	0.0972
End Time:	12/05/2021 17:24:04

## Sheet: YPD+Fz+Hm plate1
Application: Tecan i-control				Tecan i-control , 1.10.4.0
Device: infinite 200Pro				Serial number: 1306007910				Serial number of connected stacker:
Firmware: V_3.37_07/12_Infinite (Jul 20 2012/13.56.47)				MAI, V_3.37_07/12_Infinite (Jul 20 2012/13.56.47)
Date:	2021-12-05
Time:	17:21:13
System				PLATE-READER
User				MEDICINE\Multilabs
Plate				Greiner 96 Flat Bottom Transparent Polystyrol [GRE96ft.pdfx]
Plate-ID (Stacker)
Label: Label1
Mode				Absorbance
Wavelength				600	nm
Bandwidth				9	nm
Number of Flashes				25
Settle Time				0	ms
Start Time:	12/05/2021 17:21:13
	Temperature: 23 °C
<>	1	2	3	4	5	6	7	8	9	10	11	12
A	1.2179	1.2744	1.2517	0.51	0.1555	0.1083	0.1026	0.0937	0.0935	0.0935	0.0973	0.0922
B	1.2423	1.2542	1.2369	0.3775	0.1387	0.108	0.0991	0.0968	0.0911	0.0994	0.0974	0.0939
C	1.2588	1.2552	1.2319	0.7215	0.1699	0.1157	0.1038	0.1017	0.0975	0.0998	0.1018	0.0943
D	1.0944	1.1092	0.2103	0.1073	0.0991	0.0964	0.0957	0.0948	0.0936	0.0979	0.0984	0.0934
E	1.1023	1.0555	0.139	0.106	0.0993	0.1007	0.0991	0.0971	0.0959	0.0985	0.0997	0.0968
F	1.0646	1.0559	0.1201	0.1069	0.0986	0.0985	0.0998	0.0969	0.0955	0.0952	0.0949	0.0959
G	1.0097	0.693	0.1124	0.1037	0.1	0.0982	0.1012	0.0966	0.0933	0.0982	0.0954	0.0973
H	1.1626	0.662	0.113	0.1067	0.0984	0.1019	0.1013	0.0975	0.0979	0.0976	0.0995	0.0952
End Time:	12/05/2021 17:22:31

## Sheet: YPDpH8.5+Fz+Hb plate2
Application: Tecan i-control				Tecan i-control , 1.10.4.0
Device: infinite 200Pro				Serial number: 1306007910				Serial number of connected stacker:
Firmware: V_3.37_07/12_Infinite (Jul 20 2012/13.56.47)				MAI, V_3.37_07/12_Infinite (Jul 20 2012/13.56.47)
Date:	2021-12-05
Time:	17:19:36
System				PLATE-READER
User				MEDICINE\Multilabs
Plate				Greiner 96 Flat Bottom Transparent Polystyrol [GRE96ft.pdfx]
Plate-ID (Stacker)
Label: Label1
Mode				Absorbance
Wavelength				600	nm
Bandwidth				9	nm
Number of Flashes				25
Settle Time				0	ms
Part of Plate				A1-G12
Start Time:	12/05/2021 17:19:36
	Temperature: 23.3 °C
<>	1	2	3	4	5	6	7	8	9	10	11	12
A	0.3251	0.1175	0.1152	0.0963	0.0854	0.076	0.0807	0.0783	0.0792	0.0771	0.0971	0.0705
B	1.1217	0.6754	0.4323	0.124	0.128	0.092	0.0873	0.0836	0.0844	0.0902	0.0908	0.0724
C	1.0509	0.5704	0.3944	0.145	0.133	0.1054	0.1103	0.1005	0.1066	0.1012	0.1242	0.0706
D	1.023	0.5952	0.3511	0.146	0.1221	0.1223	0.0914	0.0955	0.0909	0.1031	0.1219	0.0717
E	0.1414	0.1029	0.0932	0.0788	0.073	0.0707	0.067	0.0689	0.0697	0.0685	0.0746	0.0746
F	0.1254	0.0997	0.0943	0.0796	0.0726	0.0702	0.0688	0.0765	0.0716	0.0717	0.0716	0.0732
G	0.1518	0.1044	0.0904	0.0807	0.0736	0.0726	0.0692	0.0711	0.0673	0.0677	0.074	0.0731
End Time:	12/05/2021 17:20:45

## Sheet: YPDpH8.5+Fz+Hb plate1
Application: Tecan i-control				Tecan i-control , 1.10.4.0
Device: infinite 200Pro				Serial number: 1306007910				Serial number of connected stacker:
Firmware: V_3.37_07/12_Infinite (Jul 20 2012/13.56.47)				MAI, V_3.37_07/12_Infinite (Jul 20 2012/13.56.47)
Date:	2021-12-05
Time:	17:17:54
System				PLATE-READER
User				MEDICINE\Multilabs
Plate				Greiner 96 Flat Bottom Transparent Polystyrol [GRE96ft.pdfx]
Plate-ID (Stacker)
Label: Label1
Mode				Absorbance
Wavelength				600	nm
Bandwidth				9	nm
Number of Flashes				25
Settle Time				0	ms
Start Time:	12/05/2021 17:17:54
	Temperature: 23.2 °C
<>	1	2	3	4	5	6	7	8	9	10	11	12
A	1.1721	1.1355	0.7106	0.2039	0.1422	0.123	0.109	0.1096	0.1101	0.1193	0.095	0.0694
B	1.1528	1.1328	0.7007	0.2175	0.1365	0.1104	0.1006	0.0653	0.138	0.0925	0.1091	0.0708
C	1.1716	1.181	0.802	0.224	0.1884	0.1086	0.1041	0.0934	0.1271	0.0756	0.1285	0.0715
D	0.6342	0.1582	0.0917	0.0755	0.0687	0.0661	0.0654	0.0641	0.0637	0.0643	0.073	0.07
E	0.6409	0.2237	0.0856	0.0772	0.0691	0.0662	0.0661	0.066	0.0637	0.0639	0.0691	0.0743
F	0.1957	0.27	0.1046	0.0743	0.0679	0.0695	0.0656	0.0666	0.0643	0.0644	0.0675	0.0738
G	0.2864	0.175	0.1392	0.0794	0.0954	0.0835	0.0845	0.0798	0.0851	0.0785	0.0913	0.0738
H	0.2415	0.3514	0.1471	0.0955	0.0912	0.0894	0.0866	0.0794	0.0762	0.0739	0.088	0.0733
End Time:	12/05/2021 17:19:11

## Sheet: YPD+Fz+Hb plate2
Application: Tecan i-control				Tecan i-control , 1.10.4.0
Device: infinite 200Pro				Serial number: 1306007910				Serial number of connected stacker:
Firmware: V_3.37_07/12_Infinite (Jul 20 2012/13.56.47)				MAI, V_3.37_07/12_Infinite (Jul 20 2012/13.56.47)
Date:	2021-12-05
Time:	17:16:18
System				PLATE-READER
User				MEDICINE\Multilabs
Plate				Greiner 96 Flat Bottom Transparent Polystyrol [GRE96ft.pdfx]
Plate-ID (Stacker)
Label: Label1
Mode				Absorbance
Wavelength				600	nm
Bandwidth				9	nm
Number of Flashes				25
Settle Time				0	ms
Part of Plate				A1-G12
Start Time:	12/05/2021 17:16:18
	Temperature: 22.9 °C
<>	1	2	3	4	5	6	7	8	9	10	11	12
A	0.1271	0.1072	0.1055	0.1214	0.0999	0.0959	0.0934	0.0988	0.0945	0.0921	0.0967	0.0927
B	1.1732	1.1925	1.198	1.0447	1.1221	1.0436	0.2091	0.0996	0.1013	0.0971	0.0996	0.0915
C	1.1534	1.171	1.1508	1.0955	1.0681	1.049	0.2417	0.1139	0.1019	0.0964	0.0966	0.0915
D	1.1666	1.1525	1.2261	1.0702	1.1379	1.1258	0.2928	0.1068	0.1001	0.1002	0.1033	0.0917
E	0.1255	0.1092	0.1043	0.0999	0.0979	0.1038	0.0955	0.1026	0.0954	0.0951	0.0944	0.0931
F	0.126	0.1096	0.106	0.1013	0.0982	0.0954	0.0965	0.0956	0.0971	0.1026	0.0974	0.093
G	0.1249	0.1048	0.1046	0.0998	0.0958	0.1068	0.1109	0.0882	0.0956	0.0884	0.1043	0.0931
End Time:	12/05/2021 17:17:26

## Sheet: YPD+Fz+Hb plate1
Application: Tecan i-control				Tecan i-control , 1.10.4.0
Device: infinite 200Pro				Serial number: 1306007910				Serial number of connected stacker:
Firmware: V_3.37_07/12_Infinite (Jul 20 2012/13.56.47)				MAI, V_3.37_07/12_Infinite (Jul 20 2012/13.56.47)
Date:	2021-12-05
Time:	17:14:32
System				PLATE-READER
User				MEDICINE\Multilabs
Plate				Greiner 96 Flat Bottom Transparent Polystyrol [GRE96ft.pdfx]
Plate-ID (Stacker)
Label: Label1
Mode				Absorbance
Wavelength				600	nm
Bandwidth				9	nm
Number of Flashes				25
Settle Time				0	ms
Start Time:	12/05/2021 17:14:32
	Temperature: 23 °C
<>	1	2	3	4	5	6	7	8	9	10	11	12
A	1.2529	1.2931	1.2102	1.1419	1.1882	1.146	0.2465	0.1012	0.0971	0.0924	0.0936	0.0904
B	1.1664	1.1081	1.1377	1.0441	1.1039	1.0305	0.2766	0.107	0.0994	0.0923	0.0982	0.0919
C	1.1513	1.1695	1.1694	1.037	1.1477	1.0587	0.2351	0.0991	0.1011	0.0925	0.0922	0.0907
D	0.9729	0.9735	0.9771	0.2319	0.1059	0.0993	0.0952	0.0936	0.0944	0.1004	0.0935	0.0922
E	1.0666	0.9997	1.011	0.2153	0.1112	0.0997	0.099	0.0971	0.0936	0.0948	0.0907	0.0924
F	1.1151	1.0181	1.0051	0.3176	0.0982	0.0961	0.0937	0.0893	0.0929	0.1027	0.1007	0.0924
G	0.1256	0.1092	0.1068	0.1015	0.0983	0.0941	0.1021	0.1042	0.0931	0.0942	0.0935	0.0926
H	0.1277	0.1155	0.1041	0.1035	0.0956	0.0956	0.0972	0.0936	0.1034	0.0936	0.098	0.0927
End Time:	12/05/2021 17:15:50

## Sheet: YPD+Fz+Hb MIC
HEMOGLOBIN (BOVINE)			5	2.5	1.25	0.625	0.3125	0.15625	0.078125	0.0390625	0.0195312	0.00976562	0.00488281	Blank
	YPD pH8.5+Fz
KC2	WT		1.2529	1.2931	1.2102	1.1419	1.1882	1.146	0.2465	0.1012	0.0971	0.0924	0.0936	0.0904
			1.1664	1.1081	1.1377	1.0441	1.1039	1.0305	0.2766	0.107	0.0994	0.0923	0.0982	0.0919
			1.1513	1.1695	1.1694	1.037	1.1477	1.0587	0.2351	0.0991	0.1011	0.0925	0.0922	0.0907
		avg	1.1902	1.19023	1.17243	1.07433	1.1466	1.0784	0.252733	0.102433	0.0992	0.0924	0.0946667	0.091
		avg- blank	1.0992	1.09923	1.08143	0.983333	1.0556	0.9874	0.161733	0.0114333	0.0082	0.0014	0.00366667	0
		std	0.0548222	0.0942266	0.0363451	0.058622	0.0421608	0.0602174	0.0214407	0.00409186	0.00200749	0.000100002	0.003139	0.000793723
KC139	rbt5-/-		0.9729	0.9735	0.9771	0.2319	0.1059	0.0993	0.0952	0.0936	0.0944	0.1004	0.0935	0.0922
			1.0666	0.9997	1.011	0.2153	0.1112	0.0997	0.099	0.0971	0.0936	0.0948	0.0907	0.0924
			1.1151	1.0181	1.0051	0.3176	0.0982	0.0961	0.0937	0.0893	0.0929	0.1027	0.1007	0.0924
		avg	1.05153	0.9971	0.997733	0.254933	0.1051	0.0983667	0.0959667	0.0933333	0.0936333	0.0993	0.0949667	0.0923333
		avg- blank	0.9592	0.904767	0.9054	0.1626	0.0127667	0.00603333	0.00363333	0.000999997	0.0013	0.00696667	0.00263333	0
		std	0.0722874	0.0224134	0.0181109	0.054902	0.00653682	0.00197315	0.00273191	0.00390683	0.000750557	0.00406325	0.00515881	0.000115468
KC485	pga7-/-		0.1256	0.1092	0.1068	0.1015	0.0983	0.0941	0.1021	0.1042	0.0931	0.0942	0.0935	0.0926
			0.1277	0.1155	0.1041	0.1035	0.0956	0.0956	0.0972	0.0936	0.1034	0.0936	0.098	0.0927
			0.1271	0.1072	0.1055	0.1214	0.0999	0.0959	0.0934	0.0988	0.0945	0.0921	0.0967	0.0927
		avg	0.1268	0.110633	0.105467	0.1088	0.0979333	0.0952	0.0975667	0.0988667	0.097	0.0933	0.0960667	0.0926667
		avg- blank	0.0341333	0.0179667	0.0128	0.0161333	0.00526667	0.00253333	0.0049	0.0062	0.00433333	0.000633334	0.0034	0
		std	0.00108167	0.00433167	0.00135031	0.0109577	0.00217332	0.000964366	0.00436157	0.00530031	0.00558659	0.00108166	0.00231588	5.77317e-05
KC913	frp2-/-		1.1732	1.1925	1.198	1.0447	1.1221	1.0436	0.2091	0.0996	0.1013	0.0971	0.0996	0.0915
			1.1534	1.171	1.1508	1.0955	1.0681	1.049	0.2417	0.1139	0.1019	0.0964	0.0966	0.0915
			1.1666	1.1525	1.2261	1.0702	1.1379	1.1258	0.2928	0.1068	0.1001	0.1002	0.1033	0.0917
		avg	1.1644	1.172	1.19163	1.07013	1.10937	1.0728	0.247867	0.106767	0.1011	0.0979	0.0998333	0.0915667
		avg- blank	1.07283	1.08043	1.10007	0.978567	1.0178	0.981233	0.1563	0.0152	0.00953333	0.00633333	0.00826667	0
		std	0.0100817	0.0200187	0.0380516	0.0254	0.0366007	0.0459787	0.0421894	0.00715006	0.000916512	0.00202237	0.00335609	0.000115472
KC923	frp1-/-		0.1255	0.1092	0.1043	0.0999	0.0979	0.1038	0.0955	0.1026	0.0954	0.0951	0.0944	0.0931
			0.126	0.1096	0.106	0.1013	0.0982	0.0954	0.0965	0.0956	0.0971	0.1026	0.0974	0.093
			0.1249	0.1048	0.1046	0.0998	0.0958	0.1068	0.1109	0.0882	0.0956	0.0884	0.1043	0.0931
		avg	0.125467	0.107867	0.104967	0.100333	0.0973	0.102	0.100967	0.0954667	0.0960333	0.0953667	0.0987	0.0930667
		avg- blank	0.0324	0.0148	0.0119	0.00726667	0.00423334	0.00893333	0.0079	0.0024	0.00296667	0.0023	0.00563334	0
		std	0.000550759	0.00266333	0.000907377	0.000838651	0.00130767	0.00590931	0.00861704	0.00720092	0.000929156	0.00710376	0.00507641	5.77317e-05

## Sheet: YPD+Fz+Hm MIC
HEMOGLOBIN (BOVINE)			20	10	5	2.5	1.25	0.625	0.313	0.156	0.078	0.039	0	Blank
	YPD pH8.5+Fz
KC2	WT		1.2179	1.2744	1.2517	0.51	0.1555	0.1083	0.1026	0.0937	0.0935	0.0935	0.0973	0.0922
			1.2423	1.2542	1.2369	0.3775	0.1387	0.108	0.0991	0.0968	0.0911	0.0994	0.0974	0.0939
			1.2588	1.2552	1.2319	0.7215	0.1699	0.1157	0.1038	0.1017	0.0975	0.0998	0.1018	0.0943
		avg	1.23967	1.26127	1.24017	0.536333	0.1547	0.110667	0.101833	0.0974	0.0940333	0.0975667	0.0988333	0.0934667
		avg- blank	1.1462	1.1678	1.1467	0.442867	0.0612333	0.0172	0.00836666	0.00393333	0.000566664	0.0041	0.00536667	0
		std	0.0205768	0.0113848	0.0102963	0.173505	0.0156154	0.00436157	0.00244199	0.00403361	0.00323316	0.00352751	0.0025697	0.00111505
KC139	rbt5-/-		1.0944	1.1092	0.2103	0.1073	0.0991	0.0964	0.0957	0.0948	0.0936	0.0979	0.0984	0.0934
			1.1023	1.0555	0.139	0.106	0.0993	0.1007	0.0991	0.0971	0.0959	0.0985	0.0997	0.0968
			1.0646	1.0559	0.1201	0.1069	0.0986	0.0985	0.0998	0.0969	0.0955	0.0952	0.0949	0.0959
		avg	1.0871	1.07353	0.156467	0.106733	0.099	0.0985333	0.0982	0.0962667	0.095	0.0972	0.0976667	0.0953667
		avg- blank	0.991733	0.978167	0.0611	0.0113667	0.00363333	0.00316667	0.00283333	0.0009	-0.000366668	0.00183333	0.0023	0
		std	0.0198819	0.0308889	0.0475691	0.000665833	0.000360554	0.00215019	0.00219317	0.0012741	0.00122882	0.00175784	0.00248261	0.00176163
KC485	pga7-/-		1.0097	0.693	0.1124	0.1037	0.1	0.0982	0.1012	0.0966	0.0933	0.0982	0.0954	0.0973
			1.1626	0.662	0.113	0.1067	0.0984	0.1019	0.1013	0.0975	0.0979	0.0976	0.0995	0.0952
			1.0931	0.6076	0.1059	0.1039	0.1012	0.0984	0.0989	0.0953	0.095	0.0977	0.0998	0.0953
		avg	1.08847	0.6542	0.110433	0.104767	0.0998667	0.0995	0.100467	0.0964667	0.0954	0.0978333	0.0982333	0.0959333
		avg- blank	0.992533	0.558267	0.0145	0.00883333	0.00393333	0.00356666	0.00453333	0.000533332	-0.000533332	0.0019	0.0023	0
		std	0.0765553	0.043231	0.00393743	0.0016773	0.00140476	0.00208086	0.0013577	0.00110604	0.00232594	0.000321456	0.00245832	0.00118462
KC913	frp2-/-		1.269	1.1701	1.1811	0.4163	0.1195	0.1127	0.1015	0.1008	0.098	0.0967	0.0972	0.096
			1.1817	1.1689	1.1609	0.5252	0.1391	0.1116	0.104	0.1008	0.098	0.0985	0.0994	0.0953
			1.2122	1.2189	1.059	0.5765	0.1618	0.1011	0.099	0.0951	0.0953	0.0924	0.0908	0.0965
		avg	1.22097	1.18597	1.13367	0.506	0.140133	0.108467	0.1015	0.0989	0.0971	0.0958667	0.0958	0.0959333
		avg- blank	1.12503	1.09003	1.03773	0.410067	0.0442	0.0125333	0.00556667	0.00296667	0.00116666	-6.66678e-05	-0.000133333	0
		std	0.0443056	0.0285274	0.0654473	0.0818076	0.0211689	0.00640339	0.0025	0.0032909	0.00155885	0.00313422	0.00446766	0.000602774
KC923	frp1-/-		1.0872	0.2622	0.1085	0.1027	0.0989	0.0956	0.0929	0.0941	0.0934	0.0972	0.0962	0.0965
			1.1341	0.3911	0.1123	0.1051	0.1011	0.0974	0.0972	0.0925	0.0938	0.0948	0.0922	0.0957
			1.1578	0.3167	0.1111	0.1045	0.102	0.0989	0.0984	0.095	0.0945	0.0957	0.0942	0.0972
		avg	1.12637	0.323333	0.110633	0.1041	0.100667	0.0973	0.0961667	0.0938667	0.0939	0.0959	0.0942	0.0964667
		avg- blank	1.0299	0.226867	0.0141667	0.00763333	0.0042	0.000833333	-0.000300003	-0.0026	-0.00256667	-0.000566666	-0.00226667	0
		std	0.0359297	0.0647055	0.00194251	0.001249	0.00159478	0.00165227	0.00289194	0.00126623	0.000556774	0.00121243	0.002	0.000750553

[truncated: 3 more sheets: YPDpH8.5+Fz+Hb MIC, YPDpH8.5+Fz+Hm MIC, Sheet1]
