# Supplementary material for: Ferric reductase-related proteins mediate fungal heme acquisition
Source: eLife journal article supplement (doi:10.7554/elife.80604), 2022-10-06
Supplement: fig2-data1 [file Figure 2 - source data 1.xlsx]

## Sheet: sum 13.6.21
KC2	Hm	WT	WT	WT	M7A	M7A	M7A	V			KC2	Hm	WT	WT	WT	M7A	M7A	M7A	V
raw	0uMHm	682	755	692	2223	2480	2683	192			raw	0uMHm	180	218	195	192	218	241	3
		694	759	696	2183	2526	2692	203					187	212	196	184	230	226	4
	10uMHm	257	251	228	2010	1876	1989	146				10uMHm	189	180	161	253	200	251	3
		261	265	246	2074	1923	2011	150					190	190	179	260	206	256	2
	30uMHm	237	274	278	2139	1738	1844	174				30uMHm	201	220	226	246	208	220	7
		248	279	272	2255	1798	1927	177					208	230	230	269	218	230	7
	50uMHm	237	217	199	1835	1736	1818	172				50uMHm	190	191	172	209	199	205	6
		239	222	211	1867	1732	1815	163					197	193	179	206	192	207	5
KC870	0uMHm	737	745	762	2505	2464	2318	166			KC870	0uMHm	213	216	221	224	223	210	5
		794	749	742	2473	2437	2339	171					225	219	217	219	215	207	4
	10uMHm	636	687	632	2648	2499	2317	142				10uMHm	211	200	188	230	209	200	5
		679	696	646	2716	2474	2354	143					215	205	198	235	208	201	6
	30uMHm	488	475	476	2038	2014	1923	159				30uMHm	218	235	225	193	200	190	4
		497	475	477	2073	2004	1938	158					234	233	224	197	198	195	3
	50uMHm	357	374	314	2274	2232	2192	179				50uMHm	221	222	190	209	208	208	5
		366	376	305	2375	2182	2162	175					225	206	183	216	208	203	6
KC912	0uMHm	638	509	618	2285	2462	2643	148			KC912	0uMHm	197	163	194	200	216	224	5
		664	502	614	2491	2504	2700	153					215	167	195	211	224	231	4
	10uMHm	672	729	697	2510	2252	2625	156				10uMHm	189	215	207	222	195	241	5
		697	723	710	2681	2275	2709	159					189	209	197	227	199	236	5
	30uMHm	566	511	529	2008	1885	1947	164				30uMHm	189	180	190	183	173	180	5
		610	528	552	2128	1947	1930	171					204	189	194	191	181	180	5
	50uMHm	603	507	563	2161	2182	1967	199				50uMHm	202	184	203	186	191	171	5
		634	506	555	2276	2221	1989	199					216	182	201	192	200	175	6
KC1041	0uMHm	815	695	672	2290	2227	2332	135			KC1041	0uMHm	205	172	168	189	188	197	6
		846	692	667	2413	2193	2344	145					204	172	164	195	184	201	3
	10uMHm	887	967	874	2577	2364	2530	175				10uMHm	199	232	210	203	212	203	5
		934	971	862	2714	2438	2610	183					205	236	196	212	217	209	5
	30uMHm	782	766	728	2308	2250	2311	160				30uMHm	199	203	195	207	194	202	5
		813	764	732	2389	2236	2304	157					209	208	186	210	197	202	3
	50uMHm	826	768	736	2277	2145	2221	182				50uMHm	218	206	200	185	177	177	5
		869	776	730	2283	2194	2320	198					234	207	194	185	183	191	5
w/o background											w/o background
KC2	0uMHm	490	563	500	2031	2288	2491	0			KC2	0uMHm	177	215	192	189	215	238	0
		491	556	493	1980	2323	2489	0					183	208	192	180	226	222	0
	10uMHm	111	105	82	1864	1730	1843	0				10uMHm	186	177	158	250	197	248	0
		111	115	96	1924	1773	1861	0					188	188	177	258	204	254	0
	30uMHm	63	100	104	1965	1564	1670	0				30uMHm	194	213	219	239	201	213	0
		71	102	95	2078	1621	1750	0					201	223	223	262	211	223	0
	50uMHm	65	45	27	1663	1564	1646	0				50uMHm	184	185	166	203	193	199	0
		76	59	48	1704	1569	1652	0					192	188	174	201	187	202	0
KC870	0uMHm	571	579	596	2339	2298	2152	0			KC870	0uMHm	208	211	216	219	218	205	0
		623	578	571	2302	2266	2168	0					221	215	213	215	211	203	0
	10uMHm	494	545	490	2506	2357	2175	0				10uMHm	206	195	183	225	204	195	0
		536	553	503	2573	2331	2211	0					209	199	192	229	202	195	0
	30uMHm	329	316	317	1879	1855	1764	0				30uMHm	214	231	221	189	196	186	0
		339	317	319	1915	1846	1780	0					231	230	221	194	195	192	0
	50uMHm	178	195	135	2095	2053	2013	0				50uMHm	216	217	185	204	203	203	0
		191	201	130	2200	2007	1987	0					219	200	177	210	202	197	0
KC912	0uMHm	490	361	470	2137	2314	2495	0			KC912	0uMHm	192	158	189	195	211	219	0
		511	349	461	2338	2351	2547	0					211	163	191	207	220	227	0
	10uMHm	516	573	541	2354	2096	2469	0				10uMHm	184	210	202	217	190	236	0
		538	564	551	2522	2116	2550	0					184	204	192	222	194	231	0
	30uMHm	402	347	365	1844	1721	1783	0				30uMHm	184	175	185	178	168	175	0
		439	357	381	1957	1776	1759	0					199	184	189	186	176	175	0
	50uMHm	404	308	364	1962	1983	1768	0				50uMHm	197	179	198	181	186	166	0
		435	307	356	2077	2022	1790	0					210	176	195	186	194	169	0
KC1041	0uMHm	680	560	537	2155	2092	2197	0			KC1041	0uMHm	199	166	162	183	182	191	0
		701	547	522	2268	2048	2199	0					201	169	161	192	181	198	0
	10uMHm	712	792	699	2402	2189	2355	0				10uMHm	194	227	205	198	207	198	0
		751	788	679	2531	2255	2427	0					200	231	191	207	212	204	0
	30uMHm	622	606	568	2148	2090	2151	0				30uMHm	194	198	190	202	189	197	0
		656	607	575	2232	2079	2147	0					206	205	183	207	194	199	0
	50uMHm	644	586	554	2095	1963	2039	0				50uMHm	213	201	195	180	172	172	0
		671	578	532	2085	1996	2122	0					229	202	189	180	178	186	0
		YPD+FZ ph8.5			WT	WT	WT	M7A	M7A	M7A
			KC2	0uMHm	2.76836	2.6186	2.60417	10.746	10.6419	10.4664
					2.68306	2.67308	2.56771	11	10.2788	11.2117
				10uMHm	0.596774	0.59322	0.518987	7.456	8.78173	7.43145
					0.590426	0.611702	0.542373	7.45736	8.69118	7.32677
				30uMHm	0.324742	0.469484	0.474886	8.22176	7.78109	7.84038
					0.353234	0.457399	0.426009	7.9313	7.68246	7.84753
				50uMHm	0.353261	0.243243	0.162651	8.19212	8.10363	8.27136
					0.395833	0.31383	0.275862	8.47761	8.39037	8.17822
			KC870	0uMHm	2.74519	2.74408	2.75926	10.6804	10.5413	10.4976
					2.819	2.68837	2.68075	10.707	10.7393	10.6798
				10uMHm	2.39806	2.79487	2.6776	11.1378	11.5539	11.1538
					2.56459	2.77889	2.61979	11.2358	11.5396	11.3385
				30uMHm	1.53738	1.36797	1.43439	9.9418	9.46429	9.48387
					1.46753	1.37826	1.44344	9.87113	9.46667	9.27083
				50uMHm	0.824074	0.898618	0.72973	10.2696	10.1133	9.91626
					0.872146	1.005	0.734463	10.4762	9.93564	10.0863
			KC912	0uMHm	2.55208	2.28481	2.48677	10.959	10.9668	11.3927
					2.4218	2.1411	2.41361	11.2947	10.6864	11.2203
				10uMHm	2.80435	2.72857	2.67822	10.8479	11.0316	10.4619
					2.92391	2.76471	2.86979	11.3604	10.9072	11.039
				30uMHm	2.18478	1.98286	1.97297	10.3596	10.244	10.1886
					2.20603	1.94022	2.01587	10.5215	10.0909	10.0514
				50uMHm	2.05076	1.72067	1.83838	10.8398	10.6613	10.6506
					2.07143	1.74432	1.82564	11.1667	10.4227	10.5917
			KC1041	0uMHm	3.41709	3.37349	3.31481	11.776	11.4945	11.5026
					3.48756	3.23669	3.24224	11.8125	11.3149	11.1061
				10uMHm	3.6701	3.48899	3.40976	12.1313	10.5749	11.8939
					3.755	3.41126	3.55497	12.2271	10.6368	11.8971
				30uMHm	3.20619	3.06061	2.98947	10.6337	11.0582	10.9188
					3.18447	2.96098	3.14208	10.7826	10.7165	10.7889
				50uMHm	3.02347	2.91542	2.84103	11.6389	11.4128	11.8547
					2.93013	2.86139	2.81481	11.5833	11.2135	11.4086
	technical average		KC2	0uMHm	2.72571	2.64584	2.58594	10.873	10.4603	10.839
				10uMHm	0.5936	0.602461	0.53068	7.45668	8.73645	7.37911
				30uMHm	0.338988	0.463441	0.450447	8.07653	7.73178	7.84395
				50uMHm	0.374547	0.278537	0.219256	8.33487	8.247	8.22479
			KC870	0uMHm	2.7821	2.71622	2.72001	10.6937	10.6403	10.5887
				10uMHm	2.48133	2.78688	2.64869	11.1868	11.5468	11.2462
				30uMHm	1.50246	1.37311	1.43891	9.90647	9.46548	9.37735
				50uMHm	0.84811	0.951809	0.732097	10.3729	10.0245	10.0013
			KC912	0uMHm	2.48694	2.21296	2.45019	11.1268	10.8266	11.3065
				10uMHm	2.86413	2.74664	2.774	11.1041	10.9694	10.7504
				30uMHm	2.19541	1.96154	1.99442	10.4405	10.1675	10.12
				50uMHm	2.06109	1.73249	1.83201	11.0032	10.542	10.6212
			KC1041	0uMHm	3.45232	3.30509	3.27853	11.7942	11.4047	11.3043
				10uMHm	3.71255	3.45012	3.48236	12.1792	10.6058	11.8955
				30uMHm	3.19533	3.01079	3.06578	10.7081	10.8873	10.8539
				50uMHm	2.9768	2.8884	2.82792	11.6111	11.3131	11.6316
				uM Hm	WT	M7A
	biological average	KC2	WT	0	2.6525	10.7241
				10	0.57558	7.85741
				30	0.417626	7.88409
				50	0.29078	8.26888
		KC870	frp1-/-	0	2.73944	10.6409
				10	2.63897	11.3266
				30	1.43816	9.5831
				50	0.844005	10.1329
		KC912	frp2-/-	0	2.38336	11.0866
				10	2.79492	10.9413
				30	2.05046	10.2427
				50	1.8752	10.7221
		KC1401	frp1-/- frp2-/-	0	3.34531	11.5011
				10	3.54835	11.5602
				30	3.09063	10.8164
				50	2.89771	11.5186
					WT	M7A
	standard deviation		KC2	0uMHm	0.070124	0.2291
				10uMHm	0.0391364	0.762255
				30uMHm	0.0684113	0.175843
				50uMHm	0.078366	0.0582104
			KC870	0uMHm	0.0369894	0.0524969
				10uMHm	0.153011	0.192989
				30uMHm	0.0646756	0.28349
				50uMHm	0.109914	0.208184
			KC912	0uMHm	0.148716	0.242454
				10uMHm	0.0614761	0.178529
				30uMHm	0.126603	0.172988
				50uMHm	0.168504	0.246638
			KC1401	0uMHm	0.093621	0.258776
				10uMHm	0.143117	0.838563
				30uMHm	0.0947451	0.0952843
				50uMHm	0.074876	0.178253

## Sheet: PostHoc_HS1
ANOVA
Factor	P-value
HM_Concentration	<2e-16 ***
Clone	<2e-16 ***
HM_Concentration:Clone	<2e-16 ***
Post-Hoc
Strain	Hemin Concentration Comparison	diff	p adj
WT	10uMHm-0uMHm	-2.08333	1.00253e-13
WT	30uMHm-0uMHm	-2.24	1.00253e-13
WT	50uMHm-0uMHm	-2.36667	1.00253e-13
FRP1-/-	10uMHm-0uMHm	-0.1	0.997476
FRP1-/-	30uMHm-0uMHm	-1.30333	1.3356e-13
FRP1-/-	50uMHm-0uMHm	-1.89667	1.00253e-13
FRP2-/-	10uMHm-0uMHm	0.41	0.0028853
FRP2-/-	30uMHm-0uMHm	-0.333333	0.0303018
FRP2-/-	50uMHm-0uMHm	-0.51	0.000109011
FRP1-/-:FRP2-/-	10uMHm -0uMHm	0.2	0.593573
FRP1-/-:FRP2-/-	30uMHm -0uMHm	-0.253333	0.234235
FRP1-/-:FRP2-/-	50uMHm -0uMHm	-0.446667	0.000879472

## Sheet: PostHoc_M7A
ANOVA
Factor	P-value
HM_Concentration	5.48e-10 ***
Clone	< 2e-16 ***
HM_Concentration:Clone	3.19e-08 ***
Post-Hoc
Strain	Hemin Concentration Comparison	diff	p adj
WT	10uMHm-0uMHm	-2.86333	9.89491e-10
WT	30uMHm-0uMHm	-2.84	1.2115e-09
WT	50uMHm-0uMHm	-2.45667	3.83565e-08
FRP1-/-	10uMHm-0uMHm	0.69	0.49279
FRP1-/-	30uMHm-0uMHm	-1.05333	0.0381081
FRP1-/-	50uMHm-0uMHm	-0.51	0.878924
FRP2-/-	10uMHm-0uMHm	-0.15	1
FRP2-/-	30uMHm-0uMHm	-0.846667	0.195936
FRP2-/-	50uMHm-0uMHm	-0.37	0.990491
FRP1-/-:FRP2-/-	10uMHm -0uMHm	0.0666667	1
FRP1-/-:FRP2-/-	30uMHm -0uMHm	-0.68	0.516266
FRP1-/-:FRP2-/-	50uMHm -0uMHm	0.02	1
