# Supplementary material for: Ferric reductase-related proteins mediate fungal heme acquisition
Source: eLife journal article supplement (doi:10.7554/elife.80604), 2022-10-06
Supplement: fig3-data1 [file Figure 3 - source data 1.xlsx]

## Sheet: Plate14 YPD7.5+Fz+ZnPPIX
Application: Tecan i-control				Tecan i-control , 1.10.4.0
Device: infinite 200Pro				Serial number: 1306007910				Serial number of connected stacker:
Firmware: V_3.37_07/12_Infinite (Jul 20 2012/13.56.47)				MAI, V_3.37_07/12_Infinite (Jul 20 2012/13.56.47)
Date:	18/08/2021
Time:	12:11:23
System				PLATE-READER
User				MEDICINE\Multilabs
Plate				Greiner 96 Flat Bottom Transparent Polystyrol [GRE96ft.pdfx]
Plate-ID (Stacker)
Label: Label1
Mode				Absorbance
Wavelength				600	nm
Bandwidth				9	nm
Number of Flashes				25
Settle Time				0	ms
Part of Plate				A1-E12
Start Time:	18/08/2021 12:11:23
	Temperature: 22.5 °C
<>	1	2	3	4	5	6	7	8	9	10	11	12
A	1.6922	1.4681	1.6063	1.5151	1.5205	1.2252	1.2958	1.2824	1.1466	0.9937	1.1386	0.0432	KC1053 7.5 ZnPPIX
B	1.7684	1.5765	1.5853	1.5528	1.4905	1.4095	1.4222	1.2809	1.3226	1.2194	1.0671	0.0442	KC1061 7.5 ZnPPIX
C	1.7312	1.6035	1.5592	1.502	1.5292	1.4033	1.3754	1.2918	1.3174	1.0423	1.0763	0.0455	KC1061 7.5 ZnPPIX
D	1.6983	1.4502	1.5188	1.4189	1.5034	1.46	1.3064	1.178	1.2668	1.1126	1.0179	0.0456	KC1061 7.5 ZnPPIX
E	0.6751	0.5621	0.466	0.4358	0.407	0.3316	0.2884	0.2776	0.2505	0.2069	0.1041	0.0468	7.5 ZnPPIX
End Time:	18/08/2021 12:12:13

## Sheet: Plate13 YPD7.5+Fz+ZnPPIX
Application: Tecan i-control				Tecan i-control , 1.10.4.0
Device: infinite 200Pro				Serial number: 1306007910				Serial number of connected stacker:
Firmware: V_3.37_07/12_Infinite (Jul 20 2012/13.56.47)				MAI, V_3.37_07/12_Infinite (Jul 20 2012/13.56.47)
Date:	18/08/2021
Time:	12:09:40
System				PLATE-READER
User				MEDICINE\Multilabs
Plate				Greiner 96 Flat Bottom Transparent Polystyrol [GRE96ft.pdfx]
Plate-ID (Stacker)
Label: Label1
Mode				Absorbance
Wavelength				600	nm
Bandwidth				9	nm
Number of Flashes				25
Settle Time				0	ms
Start Time:	18/08/2021 12:09:40
	Temperature: 22.2 °C
<>	1	2	3	4	5	6	7	8	9	10	11	12
A	1.0503	1.3216	0.9819	1.1629	1.2331	0.9762	0.8418	0.7003	0.5764	0.5508	1.1564	0.0447	KC590 7.5 ZnPPIX
B	1.46	1.3364	1.3975	1.1725	1.2656	1.0912	1.1509	0.9051	0.816	0.652	1.1738	0.0451	KC590 7.5 ZnPPIX
C	1.6465	1.3825	1.3982	1.1525	1.1544	0.8983	1.1935	0.9662	0.9342	0.6658	1.2171	0.0453	KC590 7.5 ZnPPIX
D	1.4555	1.2818	1.1434	1.2342	1.375	1.113	1.207	1.062	1.0775	0.9845	1.0542	0.0445	KC966 7.5 ZnPPIX
E	1.5383	1.5118	1.3284	1.2215	1.3868	1.3897	0.9756	1.1362	1.1324	0.9086	1.1461	0.046	KC966 7.5 ZnPPIX
F	1.4443	1.5075	1.3588	1.2147	1.3542	1.2243	1.1813	1.2263	1.0121	1.2149	1.2056	0.0463	KC966 7.5 ZnPPIX
G	1.7654	1.584	1.5675	1.5482	1.5193	1.4337	1.406	1.3343	1.2279	1.2194	1.1254	0.0457	KC1053 7.5 ZnPPIX
H	1.8166	1.5433	1.5736	1.536	1.5283	1.4515	1.3138	1.2377	1.3	1.0369	1.0195	0.0461	KC1053 7.5 ZnPPIX
End Time:	18/08/2021 12:10:57

## Sheet: Plate12 YPD7.5+Fz+MnPPIX
Application: Tecan i-control				Tecan i-control , 1.10.4.0
Device: infinite 200Pro				Serial number: 1306007910				Serial number of connected stacker:
Firmware: V_3.37_07/12_Infinite (Jul 20 2012/13.56.47)				MAI, V_3.37_07/12_Infinite (Jul 20 2012/13.56.47)
Date:	18/08/2021
Time:	12:07:56
System				PLATE-READER
User				MEDICINE\Multilabs
Plate				Greiner 96 Flat Bottom Transparent Polystyrol [GRE96ft.pdfx]
Plate-ID (Stacker)
Label: Label1
Mode				Absorbance
Wavelength				600	nm
Bandwidth				9	nm
Number of Flashes				25
Settle Time				0	ms
Start Time:	18/08/2021 12:07:56
	Temperature: 22.1 °C
<>	1	2	3	4	5	6	7	8	9	10	11	12
A	1.0414	0.81	1.0769	0.8435	0.9462	1.3099	1.317	1.3125	1.2295	1.2513	1.1386	0.0431	KC1053 7.5 MnPPIX
B	0.8719	1.0006	0.7379	0.8317	1.1029	1.3101	1.2464	1.2006	1.2294	1.2321	1.1189	0.0438	KC1053 7.5 MnPPIX
C	0.6922	0.6262	1.1676	1.0491	1.041	1.3537	1.2418	1.2494	1.0826	1.1803	0.9858	0.0452	KC1053 7.5 MnPPIX
D	0.8487	0.8074	0.7846	1.1737	1.4027	1.2214	1.1367	1.0296	1.1914	1.0666	0.9393	0.0453	KC1061 7.5 MnPPIX
E	1.0438	0.6922	0.7763	0.8722	1.3515	1.3203	1.2764	1.0673	1.1946	1.1295	1.0374	0.046	KC1061 7.5 MnPPIX
F	0.9943	0.8093	0.9571	1.4239	1.3608	1.3679	1.2949	1.1985	1.2359	1.1699	1.0506	0.0443	KC1061 7.5 MnPPIX
G	0.4025	0.3736	0.2973	0.2297	0.269	0.2487	0.228	0.2152	0.1946	0.193	0.0963	0.0452	7.5 MnPPIX
End Time:	18/08/2021 12:09:13

## Sheet: Plate11 YPD7.5+Fz+MnPPIX
Application: Tecan i-control				Tecan i-control , 1.10.4.0
Device: infinite 200Pro				Serial number: 1306007910				Serial number of connected stacker:
Firmware: V_3.37_07/12_Infinite (Jul 20 2012/13.56.47)				MAI, V_3.37_07/12_Infinite (Jul 20 2012/13.56.47)
Date:	18/08/2021
Time:	12:06:12
System				PLATE-READER
User				MEDICINE\Multilabs
Plate				Greiner 96 Flat Bottom Transparent Polystyrol [GRE96ft.pdfx]
Plate-ID (Stacker)
Label: Label1
Mode				Absorbance
Wavelength				600	nm
Bandwidth				9	nm
Number of Flashes				25
Settle Time				0	ms
Start Time:	18/08/2021 12:06:12
	Temperature: 22 °C
<>	1	2	3	4	5	6	7	8	9	10	11	12
A	1.423	1.4159	1.4116	1.1286	1.3584	1.2937	1.2509	1.2577	1.2621	1.1513	1.0736	0.0483	KC1061 7.5 CoPPIX
B	0.3224	0.3283	0.3057	0.2838	0.2545	0.2267	0.2142	0.2055	0.1894	0.1846	0.1595	0.0455	7.5 CoPPIX
C	0.4523	0.416	0.3787	0.3867	0.324	0.2689	0.5311	0.2594	0.4377	0.7692	1.1961	0.0453	KC590 7.5 MnPPIX
D	0.4279	0.4147	0.3846	0.3543	0.334	0.5722	0.2862	0.27	0.3968	0.6675	1.1417	0.0462	KC590 7.5 MnPPIX
E	0.4322	0.4232	0.3833	0.364	0.3274	0.3086	0.2948	0.2741	0.6037	0.519	1.1661	0.046	KC590 7.5 MnPPIX
F	0.4293	0.4139	0.3729	0.3553	0.3234	0.405	0.446	0.5355	1.2082	1.2007	1.1169	0.0484	KC966 7.5 MnPPIX
G	0.4372	0.4149	0.3757	0.3659	0.5278	0.7165	0.497	0.3943	1.1776	1.256	1.1705	0.0459	KC966 7.5 MnPPIX
H	0.4343	0.4312	0.3835	0.3606	0.3372	0.5784	0.431	0.4027	1.2735	1.263	1.2159	0.0477	KC966 7.5 MnPPIX
End Time:	18/08/2021 12:07:29

## Sheet: Plate10 YPD7.5+Fz+CoPPIX
Application: Tecan i-control				Tecan i-control , 1.10.4.0
Device: infinite 200Pro				Serial number: 1306007910				Serial number of connected stacker:
Firmware: V_3.37_07/12_Infinite (Jul 20 2012/13.56.47)				MAI, V_3.37_07/12_Infinite (Jul 20 2012/13.56.47)
Date:	18/08/2021
Time:	12:04:17
System				PLATE-READER
User				MEDICINE\Multilabs
Plate				Greiner 96 Flat Bottom Transparent Polystyrol [GRE96ft.pdfx]
Plate-ID (Stacker)
Label: Label1
Mode				Absorbance
Wavelength				600	nm
Bandwidth				9	nm
Number of Flashes				25
Settle Time				0	ms
Start Time:	18/08/2021 12:04:17
	Temperature: 22 °C
<>	1	2	3	4	5	6	7	8	9	10	11	12
A	1.3032	1.2712	1.3361	1.2548	1.2764	1.2426	1.2074	1.2869	1.2171	1.2188	1.1487	0.0451	KC966
B	1.4061	1.2353	1.3707	1.233	1.2358	1.2972	1.2019	1.2881	1.2644	1.2419	1.1716	0.0456	KC966
C	1.4286	1.2646	1.3834	1.3217	1.4518	1.3273	1.2888	1.2943	1.3052	1.2711	1.1547	0.0452	KC966
D	1.3576	1.2067	1.3231	1.1234	1.2555	1.245	1.2229	1.0038	1.2003	1.1665	1.0874	0.0447	KC1053
E	1.449	1.3869	1.4121	1.2366	1.3132	1.2207	1.2461	1.2266	1.3001	1.2588	1.1396	0.0446	KC1053
F	1.3478	1.4013	1.3453	1.2267	1.2821	1.2292	1.2571	1.1124	1.1914	1.2622	1.1323	0.0468	KC1053
G	1.3542	1.336	1.3537	1.308	1.3445	1.2932	1.1876	1.2251	1.2571	1.1557	1.0968	0.0463	KC1061
H	1.4338	1.3488	1.3286	1.2559	1.3346	1.2402	1.1441	1.1311	1.2354	1.0812	1.0407	0.0464	KC1061
End Time:	18/08/2021 12:05:34

## Sheet: Plate9 YPD7.5+Fz+GaPPIX
Application: Tecan i-control				Tecan i-control , 1.10.4.0
Device: infinite 200Pro				Serial number: 1306007910				Serial number of connected stacker:
Firmware: V_3.37_07/12_Infinite (Jul 20 2012/13.56.47)				MAI, V_3.37_07/12_Infinite (Jul 20 2012/13.56.47)
Date:	18/08/2021
Time:	12:02:14
System				PLATE-READER
User				MEDICINE\Multilabs
Plate				Greiner 96 Flat Bottom Transparent Polystyrol [GRE96ft.pdfx]
Plate-ID (Stacker)
Label: Label1
Mode				Absorbance
Wavelength				600	nm
Bandwidth				9	nm
Number of Flashes				25
Settle Time				0	ms
Start Time:	18/08/2021 12:02:14
	Temperature: 22 °C
<>	1	2	3	4	5	6	7	8	9	10	11	12
A	1.3615	1.3363	1.2745	1.058	1.1344	1.1502	1.0943	1.1417	1.207	1.0719	0.9512	0.0442	KC1053
B	1.4548	1.3453	1.287	1.2504	1.2871	1.2562	1.1982	1.1679	1.1281	1.17	1.1447	0.0451	KC1061
C	1.441	1.3249	1.2973	1.2454	1.3121	1.2617	1.2114	1.0932	1.0229	1.0352	1.0376	0.0472	KC1061
D	1.471	1.4929	1.4606	1.2852	1.2911	1.2373	1.2613	1.151	1.1373	1.1179	1.0398	0.0446	KC1061
E	0.3593	0.3406	0.3143	0.2942	0.257	0.2331	0.2159	0.1979	0.2764	0.177	0.1599	0.0464	GaPPIX 7.5
F	1.3296	1.3938	1.2431	1.3042	1.1328	1.3491	1.3218	1.2753	1.2634	1.1534	1.1658	0.0471	KC590 7.5 CoPPIX
G	1.4156	1.4301	1.4122	1.3074	1.3332	1.3436	1.2596	1.2302	1.2342	1.1931	1.1585	0.0459	KC590 7.5 CoPPIX
H	1.4032	1.4165	1.3817	1.3124	1.3863	1.3267	1.3069	1.2159	1.2228	1.1772	1.1317	0.046	KC590 7.5 CoPPIX
End Time:	18/08/2021 12:03:32

## Sheet: Plate8 YPD7.5+Fz+GaPPIX
Application: Tecan i-control				Tecan i-control , 1.10.4.0
Device: infinite 200Pro				Serial number: 1306007910				Serial number of connected stacker:
Firmware: V_3.37_07/12_Infinite (Jul 20 2012/13.56.47)				MAI, V_3.37_07/12_Infinite (Jul 20 2012/13.56.47)
Date:	18/08/2021
Time:	12:00:29
System				PLATE-READER
User				MEDICINE\Multilabs
Plate				Greiner 96 Flat Bottom Transparent Polystyrol [GRE96ft.pdfx]
Plate-ID (Stacker)
Label: Label1
Mode				Absorbance
Wavelength				600	nm
Bandwidth				9	nm
Number of Flashes				25
Settle Time				0	ms
Start Time:	18/08/2021 12:00:29
	Temperature: 22.1 °C
<>	1	2	3	4	5	6	7	8	9	10	11	12
A	0.3396	0.61	0.589	0.400009	0.3565	1.2042	1.321	1.223	1.2799	1.2283	1.1147	0.0451	KC590
B	0.4099	0.5958	0.4993	0.3786	0.3196	1.3007	1.2942	1.2096	1.2222	1.2052	1.0969	0.0453	KC590
C	0.4233	0.519998	0.3766	0.3001	0.3295	1.1951	1.3749	1.2763	1.2951	1.2915	1.1331	0.0458	KC590
D	0.4189	0.4007	0.375	0.4868	0.3586	1.0977	1.2985	1.262	1.2139	1.2215	1.0715	0.0458	KC966
E	0.4951	0.4394	0.5895	0.47881	0.3082	1.2073	1.3149	1.29	1.25	1.294	1.1459	0.0469	KC966
F	0.4273	0.6758	0.406	0.635999	0.4257	1.3031	1.3406	1.2555	1.2187	1.2913	1.1601	0.0453	KC966
G	1.3087	1.3329	1.3499	1.2282	1.2662	1.2841	1.2429	1.2132	1.1745	1.1667	1.0948	0.0474	KC1053
H	1.3037	1.3014	1.1423	1.1508	1.2163	1.2172	1.0799	1.1397	1.1248	1.1143	0.9671	0.0469	KC1053
End Time:	18/08/2021 12:01:46

## Sheet: Plate7 YPD+Fz+ZnPPIX
Application: Tecan i-control				Tecan i-control , 1.10.4.0
Device: infinite 200Pro				Serial number: 1306007910				Serial number of connected stacker:
Firmware: V_3.37_07/12_Infinite (Jul 20 2012/13.56.47)				MAI, V_3.37_07/12_Infinite (Jul 20 2012/13.56.47)
Date:	18/08/2021
Time:	11:58:42
System				PLATE-READER
User				MEDICINE\Multilabs
Plate				Greiner 96 Flat Bottom Transparent Polystyrol [GRE96ft.pdfx]
Plate-ID (Stacker)
Label: Label1
Mode				Absorbance
Wavelength				600	nm
Bandwidth				9	nm
Number of Flashes				25
Settle Time				0	ms
Part of Plate				A1-E12
Start Time:	18/08/2021 11:58:42
	Temperature: 22 °C
<>	1	2	3	4	5	6	7	8	9	10	11	12
A	1.3266	1.2068	1.1303	0.9824	1.0457	0.8168	0.6657	0.7348	0.8152	1.0689	1.2498	0.044	KC1053
B	1.2833	1.4601	1.2861	1.0518	1.2594	1.2063	1.1523	1.1166	1.188	1.1414	1.1926	0.0441	KC1061
C	1.5744	1.3967	1.2729	1.2735	1.2613	1.0495	1.1043	1.0293	1.136	1.1723	1.0638	0.0447	KC1061
D	1.435	1.35	1.3848	1.2089	1.3011	1.136	1.1714	1.1023	1.194	1.1845	1.0918	0.0462	KC1061
E	0.5737	0.5034	0.417	0.3616	0.367	0.2783	0.2408	0.2451	0.1966	0.1584	0.099	0.0463	ZnPPIX
End Time:	18/08/2021 11:59:32

## Sheet: Plate6 YPD+Fz+ZnPPIX
Application: Tecan i-control				Tecan i-control , 1.10.4.0
Device: infinite 200Pro				Serial number: 1306007910				Serial number of connected stacker:
Firmware: V_3.37_07/12_Infinite (Jul 20 2012/13.56.47)				MAI, V_3.37_07/12_Infinite (Jul 20 2012/13.56.47)
Date:	18/08/2021
Time:	11:56:57
System				PLATE-READER
User				MEDICINE\Multilabs
Plate				Greiner 96 Flat Bottom Transparent Polystyrol [GRE96ft.pdfx]
Plate-ID (Stacker)
Label: Label1
Mode				Absorbance
Wavelength				600	nm
Bandwidth				9	nm
Number of Flashes				25
Settle Time				0	ms
Start Time:	18/08/2021 11:56:57
	Temperature: 21.9 °C
<>	1	2	3	4	5	6	7	8	9	10	11	12
A	0.7168	0.6809	0.5114	0.507	0.484	0.3583	0.3726	0.3061	0.2744	0.3411	1.0571	0.043	KC590
B	0.8245	0.7059	0.7665	0.5406	0.6534	0.4252	0.2976	0.3119	0.3864	0.3062	1.0763	0.0446	KC590
C	1.0402	0.7705	0.8397	0.6603	0.5993	0.3758	0.2964	0.3391	0.3285	0.3139	1.0875	0.0483	KC590
D	0.9017	0.8614	0.8863	0.6725	0.8541	0.5252	0.7228	0.7702	0.7222	0.5948	0.7241	0.0453	KC966
E	1.1055	0.9223	0.9539	0.8257	0.8451	0.6751	0.741	0.7334	0.7284	0.6824	1.0777	0.0456	KC966
F	1.0639	1.0004	0.9463	1.0242	0.7862	0.6996	0.7486	0.8256	0.7667	0.7012	0.9587	0.0441	KC966
G	1.3348	1.2665	1.0938	1.0571	0.9601	0.7228	0.6036	0.5219	0.7943	1.1218	1.2009	0.0483	KC1053
H	1.3443	1.2414	1.0531	0.8915	0.9755	0.8244	0.6804	0.651	0.7497	1.1377	1.2356	0.0461	KC1053
End Time:	18/08/2021 11:58:14

## Sheet: Plate5 YPD+Fz+MnPPIX
Application: Tecan i-control				Tecan i-control , 1.10.4.0
Device: infinite 200Pro				Serial number: 1306007910				Serial number of connected stacker:
Firmware: V_3.37_07/12_Infinite (Jul 20 2012/13.56.47)				MAI, V_3.37_07/12_Infinite (Jul 20 2012/13.56.47)
Date:	18/08/2021
Time:	11:55:08
System				PLATE-READER
User				MEDICINE\Multilabs
Plate				Greiner 96 Flat Bottom Transparent Polystyrol [GRE96ft.pdfx]
Plate-ID (Stacker)
Label: Label1
Mode				Absorbance
Wavelength				600	nm
Bandwidth				9	nm
Number of Flashes				25
Settle Time				0	ms
Start Time:	18/08/2021 11:55:08
	Temperature: 22 °C
<>	1	2	3	4	5	6	7	8	9	10	11	12
A	0.4509	0.4308	0.3635	0.3189	0.3959	0.3321	0.3217	0.4364	0.7646	1.0744	1.1583	0.0439	KC1053
B	1.1023	0.5311	0.4042	0.3437	0.3126	0.3356	0.2988	0.4799	0.4976	0.9708	1.1385	0.0439	KC1053
C	0.5064	0.4046	0.3815	0.424	0.2806	0.2768	0.2964	0.5296	0.7042	1.0486	1.0311	0.0447	KC1053
D	0.6385	0.7113	0.7806	0.9361	1.0242	1.0952	1.1041	0.9893	1.1546	1.1103	1.1484	0.0459	KC1061
E	0.7057	0.7368	0.8176	0.9248	0.9689	1.1106	1.1176	1.0228	1.1535	1.1349	1.1449	0.0458	KC1061
F	0.9659	0.8205	0.9272	1.0991	1.1192	1.0625	1.1514	1.1809	1.1777	1.1935	1.2014	0.0445	KC1061
G	0.4158	0.3721	0.3215	0.2987	0.2538	0.2032	0.1937	0.1721	0.1512	0.1324	0.1012	0.0456	MnPPIX
End Time:	18/08/2021 11:56:26

[truncated: 12 more sheets: Plate4 YPD+Fz+MnPPIX, Plate3 YPD+Fz+CoPPIX, Plate2 YPD+Fz+GaPPIX, Plate1 YPD+Fz+GaPPIX, GaPPIX, CoPPIX, MnPPIX, ZnPPIX, GaPPIX 7.5, CoPPIX 7.5, MnPPIX 7.5, ZnPPIX 7.5]
